# Supplementary material for: The Need to Set up a Biobank Dedicated to Lymphoid Malignancies: Experience of a Single Center (Laboratory of Clinical and Experimental Pathology, University Côte d’Azur, Nice, France)
Source: MDPI journal article supplement (doi:10.3390/jpm13071076), 2023-06-29
Supplement: s1 [file s1]

**Table S1.** Univariate log-rank analysis of overall survival.

| Variable                   | N. of patient<br>with data | Median survival,<br>month | HR (95%CI)    | p value |
|----------------------------|----------------------------|---------------------------|---------------|---------|
| <b>Age at diagnosis, y</b> |                            |                           | 3.3 (2.2–5.0) | <0.001  |
| >60                        | 133                        | 69                        |               |         |
| ≤60                        | 155                        | NR                        |               |         |
| <b>Sex</b>                 |                            |                           | 2.5 (1.7–3.7) | <0.001  |
| Male                       | 169                        | 105                       |               |         |
| Female                     | 119                        | 148                       |               |         |
| <b>Stage</b>               |                            |                           | NA            | 0.029   |
| I                          | 9                          | NR                        |               |         |
| II                         | 19                         | NR                        |               |         |
| III                        | 20                         | 105                       |               |         |
| IV                         | 17                         | 129                       |               |         |
| <b>Lymphoma type</b>       |                            |                           | NA            | <0.001  |
| B-cell lymphoma            | 185                        | 113                       |               |         |
| Classical Hodgkin lymphoma | 79                         | NR                        |               |         |
| T-cell lymphoma            | 19                         | 46                        |               |         |
| Lymphoma, NOS              | 5                          | 42                        |               |         |
| <b>LDH at diagnosis</b>    |                            |                           | 1.3 (0.6–2.9) | 0.12    |
| Elevated                   | 48                         | 166                       |               |         |
| Normal                     | 65                         | NR                        |               |         |

HR : Hazard ratio ; NR : not reached ; NA : not applicable.

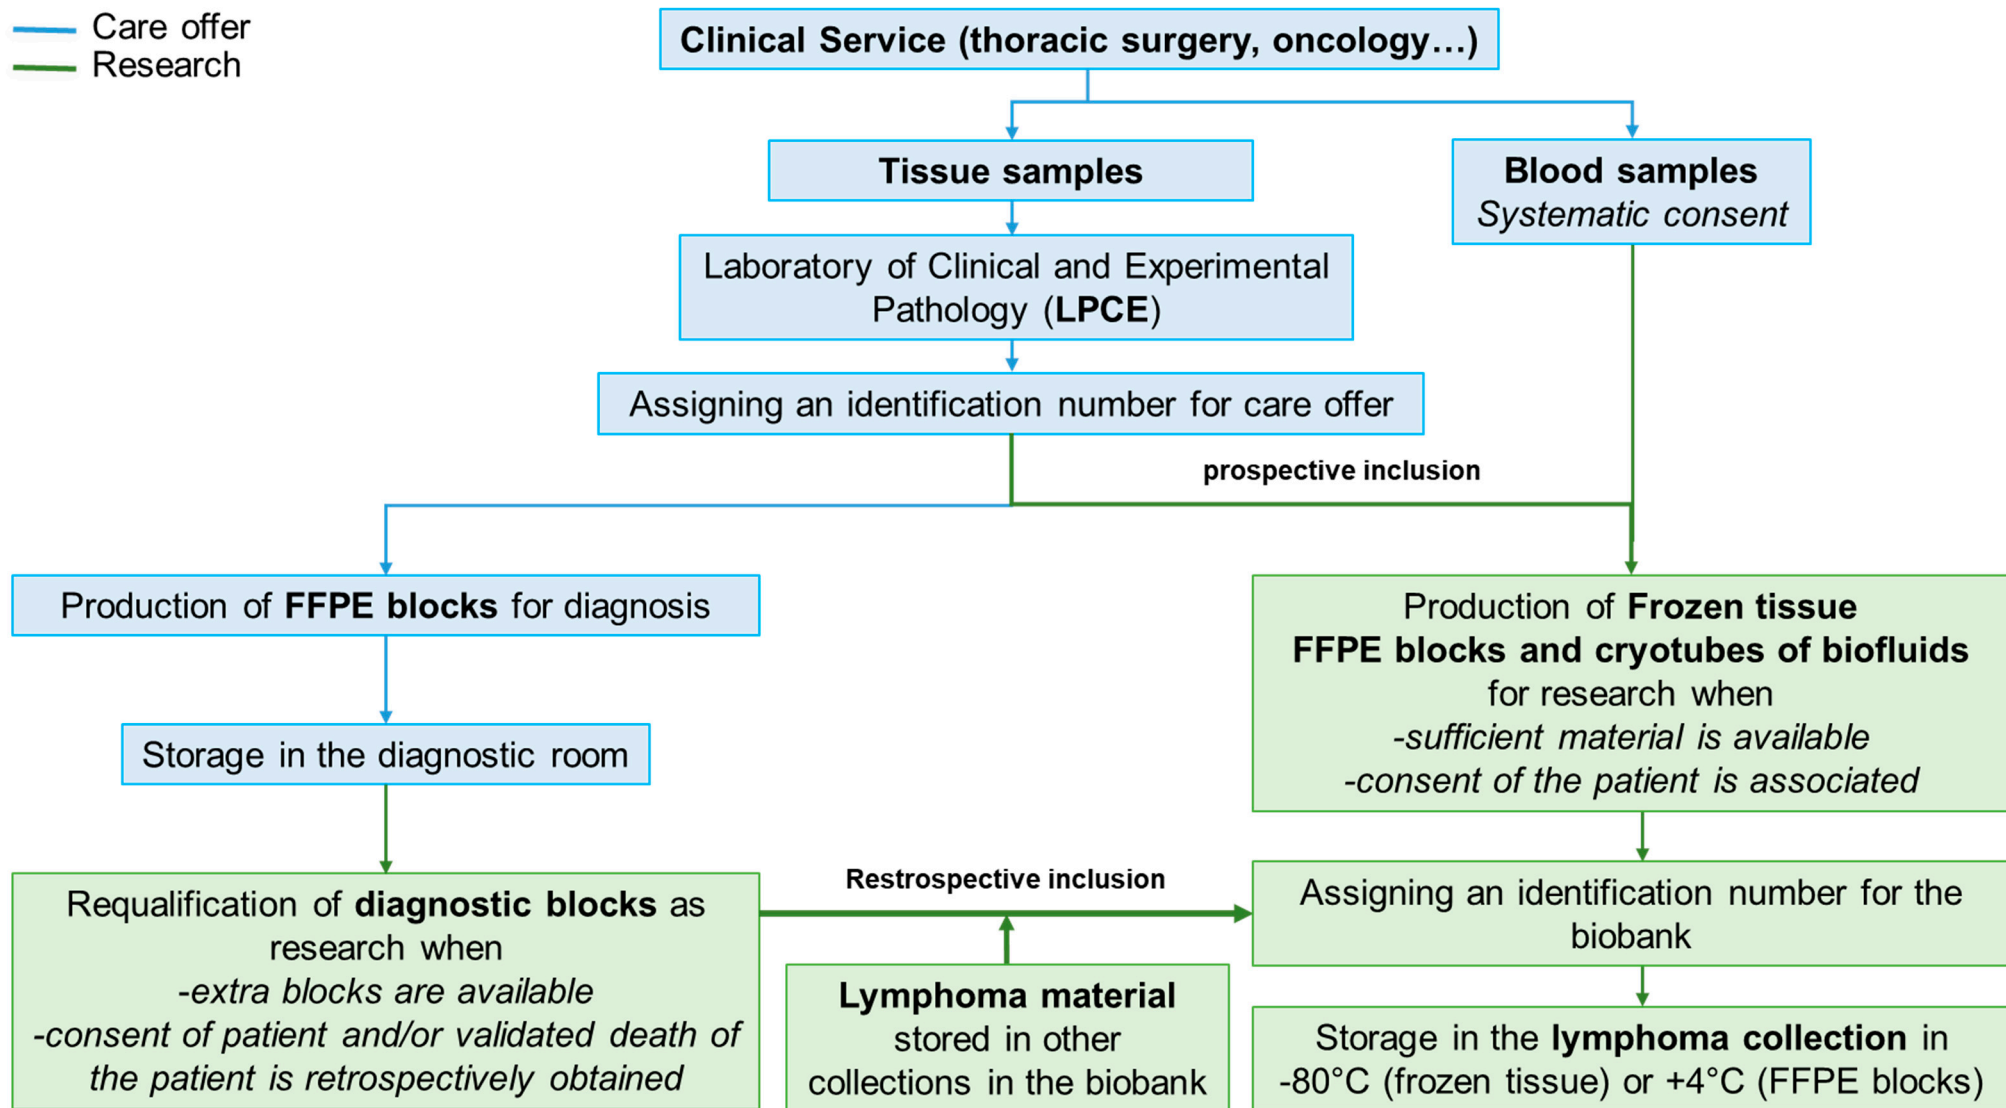

**Supplemental Figure S1.** Flow chart of the cohort of cases included in the lymphoma collection of the biobank
